# Supplementary material for: Prognostic Implications of Fractional Flow Reserve After Coronary Stenting: A Systematic Review and Meta-analysis
Source: PubMed Central journal article supplement (PMC9500557; doi:10.1001/jamanetworkopen.2022.32842), 2022-09-22
Supplement: jamanetwopen-e2232842-s001.pdf [file jamanetwopen-e2232842-s001.pdf]

## Supplemental Online Content

Hwang D, Koo BK, Zhang J, et al. Prognostic implications of fractional flow reserve after coronary stenting: a systematic review and meta-analysis. *JAMA Netw Open*. 2022;5(9):e2232842. doi:10.1001/jamanetworkopen.2022.32842

**eAppendix 1.** Search Strategy on PubMed, EMBASE, and Cochrane Library

**eAppendix 2.** List of Excluded Studies

**eTable 1.** List of Studies Met the Criteria for the Post-PCI FLOW Registry

**eTable 2.** List of Studies and Cohorts Included in the Post-PCI FLOW Registry

**eTable 3.** Number of Patients Provided by Each Cohort and Number of Patients Included in the Master Data Set

**eTable 4.** Description of the Included Cohorts

**eTable 5.** The Newcastle-Ottawa Scale for Assessing the Quality of Observational Cohorts

**eTable 6.** Baseline Characteristics of the Study Population

**eTable 7.** Per-vessel Specific Characteristics and Outcomes

**eTable 8.** Cumulative Incidence and Risk of Clinical Events According to Post-PCI FFR Strata

**eTable 9.** The Risk of Clinical Events at 2 Years per Post-PCI FFR 0.01 Decrease in Subgroups

**eTable 10.** Predictors of TVF and Cardiac Death or TVMI

**eTable 11.** Clinical Events According to Post-PCI FFR Cut-off Value

**eFigure 1.** Flow Chart of Study Selection Process

**eFigure 2.** Hazard Ratios of Clinical Events According to Post-PCI FFR Strata

**eFigure 3.** The Risks of Clinical Events per Post-PCI FFR 0.01 Decrease According to Subgroups

**eFigure 4.** Optimal Cut-off Values of Post-PCI FFR for Predicting Future Events

**eReferences.**

This supplemental material has been provided by the authors to give readers additional information about their work.

**eAppendix 1.** Search Strategy on PubMed, EMBASE, and Cochrane Library

| Pubmed     |                                    |                  | EMBASE     |                                    |                  | Cochrane Library |                                    |                |
|------------|------------------------------------|------------------|------------|------------------------------------|------------------|------------------|------------------------------------|----------------|
| <b>#14</b> | #3 and #10 and #13                 | <b>599</b>       | <b>#14</b> | #3 and #10 and #13                 | <b>1,438</b>     | <b>#14</b>       | #3 and #10 and #13                 | <b>231</b>     |
| <b>#13</b> | #11 or #12                         | <b>4,974</b>     | <b>#13</b> | #11 or #12                         | <b>10,474</b>    | <b>#13</b>       | #11 or #12                         | <b>709</b>     |
| <b>#12</b> | Fractional flow reserve            | <b>3,687</b>     | <b>#12</b> | Fractional flow reserve            | <b>8,631</b>     | <b>#12</b>       | Fractional flow reserve            | <b>561</b>     |
| <b>#11</b> | FFR                                | <b>3,725</b>     | <b>#11</b> | FFR                                | <b>6,722</b>     | <b>#11</b>       | FFR                                | <b>525</b>     |
| <b>#10</b> | #4 or #5 or #6 or #7 or #8 or #9   | <b>138,442</b>   | <b>#10</b> | #4 or #5 or #6 or #7 or #8 or #9   | <b>233,585</b>   | <b>#10</b>       | #4 or #5 or #6 or #7 or #8 or #9   | <b>25,326</b>  |
| <b>#9</b>  | Stent implantation                 | <b>10,645</b>    | <b>#9</b>  | Stent implantation                 | <b>17,841</b>    | <b>#9</b>        | Stent implantation                 | <b>3,532</b>   |
| <b>#8</b>  | stent                              | <b>83,586</b>    | <b>#8</b>  | stent                              | <b>137,084</b>   | <b>#8</b>        | stent                              | <b>14,125</b>  |
| <b>#7</b>  | stenting                           | <b>35,275</b>    | <b>#7</b>  | stenting                           | <b>59,534</b>    | <b>#7</b>        | stenting                           | <b>5,584</b>   |
| <b>#6</b>  | Coronary stenting                  | <b>2,999</b>     | <b>#6</b>  | Coronary stenting                  | <b>4,312</b>     | <b>#6</b>        | Coronary stenting                  | <b>2,894</b>   |
| <b>#5</b>  | Percutaneous coronary intervention | <b>38,982</b>    | <b>#5</b>  | Percutaneous coronary intervention | <b>61,961</b>    | <b>#5</b>        | Percutaneous coronary intervention | <b>11,803</b>  |
| <b>#4</b>  | PCI                                | <b>31,474</b>    | <b>#4</b>  | PCI                                | <b>66,948</b>    | <b>#4</b>        | PCI                                | <b>9,523</b>   |
| <b>#3</b>  | #1 or #2                           | <b>6,031,609</b> | <b>#3</b>  | #1 or #2                           | <b>8,312,694</b> | <b>#3</b>        | #1 or #2                           | <b>837,188</b> |
| <b>#2</b>  | after                              | <b>5,447,234</b> | <b>#2</b>  | after                              | <b>7,434,051</b> | <b>#2</b>        | after                              | <b>739,447</b> |
| <b>#1</b>  | post                               | <b>979,209</b>   | <b>#1</b>  | post                               | <b>1,591,751</b> | <b>#1</b>        | post                               | <b>213,121</b> |

## **eAppendix 2. List of Excluded Studies**

### **i. Studies with inadequate end points**

1. Fujita H, Inoue N, Matsuo Y, et al. Fractional myocardial flow reserve (FFR<sub>myo</sub>) after coronary intervention as a predictor of chronic restenosis. *J Invasive Cardiol* 1999; 11(9): 527-32.
2. Nakamura S, Anzai H, Takagi T, et al. [Pressure wire guide provisional coronary stent implantation]. *J Cardiol* 2001; 37(4): 191-9.
3. Pijls NH, Klauss V, Siebert U, et al. Coronary pressure measurement after stenting predicts adverse events at follow-up: a multicenter registry. *Circulation* 2002; 105(25): 2950-4.
4. Tanaka N, Takazawa K, Shindo N, et al. Decrease of fractional flow reserve shortly after percutaneous coronary intervention. *Circ J* 2006; 70(10): 1327-31.
5. Ntalianis A, Sels JW, Davidavicius G, et al. Fractional flow reserve for the assessment of nonculprit coronary artery stenoses in patients with acute myocardial infarction. *JACC Cardiovasc Interv* 2010; 3(12): 1274-81.
6. Rai A, Bahremand M, Saidi MR, et al. The Value of Pre- and post-stenting fractional flow reserve for predicting mid-term stent restenosis following percutaneous coronary intervention (PCI). *Glob J Health Sci* 2015; 8(7): 240-44.
7. Baranauskas A, Peace A, Kibarskis A, et al. FFR result post PCI is suboptimal in long diffuse coronary artery disease. *EuroIntervention* 2016; 12(12): 1473-80.
8. Murai T, Yonetsu T, Kanaji Y, et al. Prognostic value of the index of microcirculatory resistance after percutaneous coronary intervention in patients with non-ST-segment elevation acute coronary syndrome. *Catheter Cardiovasc Interv* 2018; 92(6): 1063-74.
9. Nakamura D, Wijns W, Price MJ, et al. New Volumetric analysis method for stent expansion and its correlation with final fractional flow reserve and clinical outcome: An ILUMIEN I Substudy. *JACC Cardiovasc Interv* 2018; 11(15): 1467-78.
10. Zhao Q, Ji Z, Li X, et al. Analysis of the clinical value of fractional flow reserve for prognosis evaluation of patients of percutaneous coronary intervention. *Exp Ther Med* 2018; 15(1): 673-8.

### **ii. Study with a follow-up less than 6 months**

1. van Bommel RJ, Masdjedi K, Diletti R, et al. Routine fractional flow reserve measurement after percutaneous coronary intervention. *Circ Cardiovasc Interv* 2019; 12(5): e007428.

### **iii. Inappropriate study design or study population**

1. Bech GJ, De Bruyne B, Akasaka T, et al. Coronary pressure and FFR predict long-term outcome after PTCA. *Int J Cardiovasc Intervent* 2001; 4(2): 67-76.
2. van't Veer M, Pijls NH, Aarnoudse W, Koolen JJ, van de Vosse FN. Evaluation of the haemodynamic characteristics of drug-eluting stents at implantation and at follow-up. *Eur Heart J* 2006; 27(15): 1811-7.
3. Beleslin B, Ostojic M, Djordjevic-Dikic A, et al. The value of fractional and coronary flow reserve in predicting myocardial recovery in patients with previous myocardial infarction. *Eur Heart J* 2008; 29(21): 2617-24.
4. Samady H, McDaniel M, Veledar E, et al. Baseline fractional flow reserve and stent diameter predict optimal post-stent fractional flow reserve and major adverse cardiac events after bare-metal stent deployment. *JACC Cardiovasc Interv* 2009; 2(4): 357-63.

5. Ye F, Zhang JJ, Tian NL, et al. The acute changes of fractional flow reserve in DK (double kissing), crush, and 1-stent technique for true bifurcation lesions. *J Interv Cardiol* 2010; 23(4): 341-5.
6. Brito MB, Sant'Anna FM, Soares Jr RSP, Couceiro SLM, Buczynski LC, Barrozo CAM. Use of myocardial fractional flow reserve to identify predictors of poor prognosis after percutaneous coronary interventions. *Revista Brasileira de Cardiologia Invasiva* 2013; 21(4): 4.
7. Morris PD, Ryan D, Morton AC, et al. Virtual fractional flow reserve from coronary angiography: modeling the significance of coronary lesions: results from the VIRTU-1 (VIRTUAl Fractional Flow Reserve From Coronary Angiography) study. *JACC Cardiovasc Interv* 2013; 6(2): 149-57.
8. Murai T, Lee T, Yonetsu T, Isobe M, Kakuta T. Influence of microvascular resistance on fractional flow reserve after successful percutaneous coronary intervention. *Catheter Cardiovasc Interv* 2015; 85(4): 585-92.
9. Kimura Y, Tanaka N, Okura H, et al. Characterization of real-world patients with low fractional flow reserve immediately after drug-eluting stents implantation. *Cardiovasc Interv Ther* 2016; 31(1): 29-37.
10. Kobayashi Y, Nam CW, Tonino PA, et al. The Prognostic value of residual coronary stenoses after functionally complete revascularization. *J Am Coll Cardiol* 2016; 67(14): 1701-11.
11. Sakoda K, Tanaka N, Hokama Y, et al. Association of moderate chronic kidney disease with insufficient improvement of fractional flow reserve after stent implantation. *Catheter Cardiovasc Interv* 2016; 88(2): E38-44.
12. Agarwal SK, Kasula S, Almomani A, et al. Clinical and angiographic predictors of persistently ischemic fractional flow reserve after percutaneous revascularization. *Am Heart J* 2017; 184: 10-6.
13. Ahn JM, Park DW, Shin ES, et al. Fractional flow reserve and cardiac events in coronary artery disease: data from a prospective IRIS-FFR Registry (Interventional Cardiology Research Incooperation Society Fractional Flow Reserve). *Circulation* 2017; 135(23): 2241-51.
14. Kawase Y, Omori H, Kawasaki M, et al. Postocclusion hyperemia for fractional flow reserve after percutaneous coronary intervention. *Circ Cardiovasc Interv* 2017; 10(12):e005674. doi: 10.1161/CIRCINTERVENTIONS.117.005674.
15. Murai T, Kanaji Y, Yonetsu T, et al. Preprocedural fractional flow reserve and microvascular resistance predict increased hyperaemic coronary flow after elective percutaneous coronary intervention. *Catheter Cardiovasc Interv* 2017; 89(2): 233-42.
16. Pyxaras SA, Toth GG, Di Gioia G, et al. Anatomical and functional assessment of Tryton bifurcation stent before and after final kissing balloon dilatation: Evaluations by three-dimensional coronary angiography, optical coherence tomography imaging and fractional flow reserve. *Catheter Cardiovasc Interv* 2017; 90(1): E1-e10.
17. Yu Y, Zhou Y, Ma Q, et al. The conical stent in coronary artery improves hemodynamics compared with the traditional cylindrical stent. *Int J Cardiol* 2017; 227: 166-71.
18. Kawase Y, Kawasaki M, Kikuchi J, et al. Residual pressure gradient across the implanted stent: An important factor of post-PCI physiological results. *J Cardiol* 2018; 71(5): 458-63.
19. Mohdnazri SR, Karamasis GV, Al-Janabi F, et al. The impact of coronary chronic total occlusion percutaneous coronary intervention upon donor vessel fractional flow reserve and instantaneous wave-free ratio: Implications for physiology-guided PCI in patients with CTO. *Catheter Cardiovasc Interv* 2018; 92(3): E139-e48.
20. Wolfrum M, De Maria GL, Benenati S, et al. What are the causes of a suboptimal FFR after coronary stent deployment? Insights from a consecutive series using OCT imaging. *EuroIntervention* 2018; 14(12): e1324-e31.
21. Lee CH, Choi SW, Hwang J, et al. 5-year outcomes according to FFR of left circumflex coronary artery after left main crossover stenting. *JACC Cardiovasc Interv* 2019; 12(9): 847-55.

22. van der Hoeven NW, Janssens GN, de Waard GA, et al. Temporal changes in coronary hyperemic and resting hemodynamic indices in nonculprit vessels of patients with ST-segment elevation myocardial infarction. *JAMA Cardiol* 2019; 4(8): 736-744.
23. Zhang YH, Li J, Flammer AJ, et al. Long-term outcomes after fractional flow reserve-guided percutaneous coronary intervention in patients with severe coronary stenosis. *J Geriatr Cardiol* 2019; 16(4): 329-37.
24. Ahn SG, Hong S, Son JW, et al. Validation of post-stenting fractional flow reserve with intravascular ultrasound parameters for optimal stent deployment. *Int J Cardiovasc Imaging* 2020; 36(2): 197-203.
25. Belguidoum S, Meneveau N, Motreff P, et al. Relationship between stent expansion and post-PCI fractional flow reserve: a DOCTORS sub study. *EuroIntervention* 2020; EIJ-D-19-01103. doi: 10.4244/EIJ-D-19-01103.

#### **iv. Not original articles**

1. Chamuleau SA. Fractional flow reserve: can it predict adverse events accurately after coronary stenting? *Nat Clin Pract Cardiovasc Med* 2005; 2(6): 282-3.
2. Klauss V, Erdin P, Rieber J, et al. Fractional flow reserve for the prediction of cardiac events after coronary stent implantation: results of a multivariate analysis. *Heart* 2005; 91(2): 203-6.
3. Michels M, Werner H, Onderwater E, van der Giessen WJ. Residual angina pectoris after percutaneous coronary intervention for acute coronary syndrome. *Neth Heart J* 2005; 13(9): 315-7.
4. Ishibashi Y, Yamauchi M, Uematsu M, et al. The value of fractional flow reserve in predicting myocardial protective effect in patients with previous myocardial infarction undergoing percutaneous coronary intervention. *Eur Heart J* 2011; 32: 858.
5. Lim HS, Tahk SJ, Yang HM, et al. Usefulness of a trans-stent fractional flow reserve gradient for assessing the immediate results of drug-eluting stent implantation. *Eur Heart J* 2011; 32: 858.
6. Lim HS, Tahk SJ, Yang HM, et al. Usefulness of a trans-stent fractional flow reserve gradient for assessing the results of drug-eluting stent implantation. *Catheter Cardiovasc Interv* 2011; 77: S69-S70.
7. Lim HS, Tahk SJ, Yang HM, et al. Comparison of fractional flow reserve and intravascular ultrasound for predicting long-term clinical outcomes after drug-eluting stent implantation. *Eur Heart J* 2012; 33: 9.
8. Ahn SG, Lee JH, Lee JW, Youn YJ, Lee SH, Yoon J. Relationship between IVUS parameters and post-DES FFR. *EuroIntervention* 2013; 9: 122.
9. Ando H, Takashima H, Fujimoto M, et al. Impact of post-stent fractional flow reserve on long-term adverse event after drug-eluting stent implantation. *J Am Coll Cardiol* 2013; 62(18): B185.
10. Kim HY, Doh JH, Choi WH, Nam CW, Koo BK, Lee SY. Influence of post-stent fractional flow reserve and stent cross-sectional area on clinical outcome in patient treated with drug eluting stent. *Circulation* 2013; 128(22).
11. Ando H, Takashima H, Suzuki A, et al. Fractional flow reserve for the prediction of cardiac events after drug-eluting stent implantation. *Eur Heart J* 2014; 35: 1139.
12. Ando H, Takashima H, Suzuki A, et al. Lesion characteristics as a predictor of optimal post-stent fractional flow reserve. *Eur Heart J* 2014; 35: 1141.
13. Ando H, Takashima H, Suzuki A, et al. Impact of pressure drop pattern on post-stent fractional flow reserve. *Catheter Cardiovasc Interv* 2014; 83: S96.
14. Bravo Baptista S, Raposo L, Santos L, et al. Patterns of use and clinical utility of FFR in patients referred for coronary angiography: The POST-IT (Portuguese Study on the Evaluation of FFR-guided Treatment of coronary disease) prospective multicentre registry. *EuroIntervention* 2014.

15. Banerjee S. Provisional observation of FFR outcome proves utility in ambiguous vessel abnormality. *Indian Heart Journal* 2015; 67: S67-S8.
16. Baranauskas A, Davidavicius G, Bajoras V, Kibarskis A, Bilkis V, Laucevicius A. Predictive FFR value after PCI on long coronary lesions. *JACC Cardiovasc Interv* 2015; 8(2): S23.
17. Hakeem A, Agarwal SK, Kasula S, Hacıoglu Y, Ahmed Z, Uretsky B. Value of routine post PCI FFR in the identification and management of angiographically optimized stented lesions. *J Am Coll Cardiol* 2015; 65(10): A1860.
18. Kasula S, Agarwal SK, Hacıoglu Y, Uretsky B, Hakeem A. Clinical and prognostic value of post stenting FFR for assessment of ischemia reduction in patients with acute coronary syndromes. *J Am Coll Cardiol* 2015; 65(10): A1805.
19. Kikuchi J, Matsuo H, Kawase Y, et al. Evaluation of physiological improvement after PCI using instantaneous wave-free ratio (iFR): The potential of iFR to detect and predict post-PCI residual ischaemia. *EuroIntervention* 2015.
20. Baranauskas A, Peace A, Kibarskis A, et al. FFR result post-PCI is suboptimal in long diffuse coronary artery disease treated with newer-generation DES. *EuroIntervention* 2016: 107.
21. Matsuda J, Ichijo S, Hamaya R, et al. The discordance between FFR and CFR changes after percutaneous coronary intervention. *Eur Heart J* 2016; 37: 872.
22. Murai T, Yonetsu T, Kanaji Y, et al. Preprocedural fractional flow reserve and microvascular resistance predict increased hyperaemic coronary flow after elective percutaneous coronary intervention. *Eur Heart J* 2016; 37: 871.
23. Azzalini L, Candilio L, Poletti E, et al. Impact of post-percutaneous coronary intervention fractional flow reserve measurement on procedural management and clinical outcomes: The repeat-FFR study. *J Am Coll Cardiol* 2017; 70(18): B59.
24. Eid Madmani M, Abualsuod A, Edupuganti M, et al. Does post PCI FFR carry the same prognostic weight as non-ischemic FFR in deferred lesions? *J Am Coll Cardiol* 2017; 69(11): 1176.
25. Hakeem A, Uretsky BF. Clinical and prognostic value of post-stenting FFR. *JACC Cardiovasc Interv* 2017; 10(15): 1596.
26. Hoshino M, Yonetsu T, Murai T, et al. Determinants and clinical implication of post-procedural fractional flow reserve values as a predictor of major adverse cardiac events in patients with stable angina pectoris. *Eur Heart J* 2017; 38: 335.
27. Karamasis G, Mohdnazri SR, Al-Janabi F, et al. Fractional flow reserve post percutaneous coronary intervention for chronic total occlusions. *Eur Heart J* 2017; 38: 479.
28. Daemen J, Van Zandvoort L, Van Bommel R, et al. Explanation of post procedural fractional flow reserve below 0.85: A comprehensive ultrasound analysis of the ffr search registry. *JACC Cardiovasc Interv* 2018; 11(4): S36.
29. Hoshino M, Yonetsu T, Kanaji Y, et al. Determinants and clinical implication of post procedural fractional flow reserve as a predictor of major adverse cardiac events in patients. *J Am Coll Cardiol* 2018; 71(11).
30. Hoshino M, Yonetsu T, Kanaji Y, et al. Clinical significance of the fractional flow reserve measurement position after elective percutaneous coronary intervention. *Eur Heart J* 2018; 39: 952.
31. Jprn U. How does P<sub>O</sub>st-PCI FFR value using pressure catheter relate to lesion prognosis or patient prognosis COmpaRed to aNatomical evaluation? <http://www.who.int/trialssearch/Trial2.aspx?TrialID=JPRN-UMIN000031963> 2018.
32. Kobayashi Y, Fearon WF. Predicting outcomes after percutaneous coronary intervention using relative change in fractional flow reserve. *JACC Cardiovasc Interv* 2018; 11(20): 2110-2.

33. Agarwal SK, Vallurupalli S, Siraj A, et al. Delineating the prognostic value of post PCI FFR in acute coronary syndrome patients. *Circulation* 2019; 140.
34. Hakeem A, Uretsky BF. Role of Postintervention fractional flow reserve to improve procedural and clinical outcomes. *Circulation* 2019; 139(5): 694-706.
35. Hakeem A, Uretsky BF. Toward a “More perfect” interventional algorithm: Post-intervention functional assessment using quantitative flow ratio. *JACC Cardiovasc Interv* 2019; 12(20): 2076-8.
36. Hamaya R, Kanaji Y, Usui E, et al. Improvement of fractional flow reserve after percutaneous coronary intervention does not necessarily indicate increased coronary flow. *Eur Cardiol* 2019; 14(1): 10-2.
37. Hoshino M, Kanaji Y, Sugano A, et al. Prognostic value of post intervention fractional flow reserve after intravascular ultrasound guided second generation drug eluting coronary stenting. *J Am Coll Cardiol* 2019; 73(9 Supplement 1): 1121.
38. Hou L, Kasula S, Kumar Agarwal S, et al. Post PCI hemodynamics: Predictive accuracy of post stenting Pd/Pa for determining post stenting ischemia. *J Am Coll Cardiol* 2019; 73(9 Supplement 1): 1214.
39. Lim H, Yang HM, Yoon MH, et al. Usefulness of the trans-stent fractional flow reserve gradient for predicting clinical outcomes. *Eur Heart J* 2019; 40: 3726.
40. Madmani ME, Hasan R, Ayan M, et al. Comparison of prognostic value of fractional flow reserve in deferred patients with normal FFR with normal FFR post-PCI patients with stable coronary artery disease. *Catheter Cardiovasc Interv* 2019; 93: S95-S6.
41. van Zandvoort LJC, Masdjedi K, Tovar Forero MN, et al. Fractional flow reserve guided percutaneous coronary intervention optimization directed by high-definition intravascular ultrasound versus standard of care: Rationale and study design of the prospective randomized FFR-REACT trial. *Am Heart J* 2019; 213: 66-72.
42. Van Zandvoort LJC, Masdjedi K, Witberg K, et al. Explanation of postprocedural fractional flow reserve below 0.85: A comprehensive ultrasound analysis of the FFR SEARCH registry. *Circ Cardiovasc Interv* 2019; 12(2): e007030.
43. Agarwal SK, Hakeem A, Hasan R, et al. Fractional flow reserve after functionally optimized coronary intervention (FCI) predicts long-term outcomes. *J Am Coll Cardiol* 2020; 75(11): 1456.



**eTable 1.** List of Studies Met the Criteria for the Post-PCI FLOW Registry

| No. | Title                                                                                                                                                                                                  | First Author           | Journal                                    | Provided raw data |
|-----|--------------------------------------------------------------------------------------------------------------------------------------------------------------------------------------------------------|------------------------|--------------------------------------------|-------------------|
| 1   | The impact of fractional flow reserve measurement on clinical outcomes after transradial coronary stenting.                                                                                            | Leesar, M. A., et al.  | EuroIntervention (2011) <sup>1</sup>       | Yes               |
| 2   | Relation of fractional flow reserve after drug-eluting stent implantation to one-year outcomes.                                                                                                        | Nam, C. W., et al.     | Am J Cardiol (2011) <sup>2</sup>           | Yes               |
| 3   | Hemodynamic changes of fractional flow reserve after double kissing crush and provisional stenting technique for true bifurcation lesions.                                                             | Ye, F., et al.         | Chin Med J (Engl) (2012) <sup>3</sup>      | Yes               |
| 4   | Clinical implications of coronary pressure measurement after stent implantation.                                                                                                                       | Matsuo, A., et al.     | Cardiovasc Interv Ther (2013) <sup>4</sup> | Yes               |
| 5   | Relationship between fractional flow reserve and residual plaque volume and clinical outcomes after optimal drug-eluting stent implantation: insight from intravascular ultrasound volumetric analysis | Ito, T., et al.        | Int J Cardiol (2014) <sup>5</sup>          | Yes               |
| 6   | Prognostic value of fractional flow reserve: linking physiologic severity to clinical outcomes.                                                                                                        | Johnson, N. P., et al. | J Am Coll Cardiol (2014) <sup>6</sup>      | Yes               |
| 7   | Clinical Relevance of Poststent Fractional Flow Reserve After Drug-Eluting Stent Implantation.                                                                                                         | Doh, J. H., et al.     | J Invasive Cardiol (2015) <sup>7</sup>     | Yes               |
| 8   | Correlation between OCT-derived intrastent dimensions and fractional flow reserve measurements after coronary stent implantation and impact on clinical outcome.                                       | Reith, S., et al.      | J Invasive Cardiol (2015) <sup>8</sup>     | No                |
| 9   | Utilizing Post-Intervention Fractional Flow Reserve to Optimize Acute Results and the Relationship to Long-Term Outcomes.                                                                              | Agarwal, S. K., et al. | JACC Cardiovasc Interv (2016) <sup>9</sup> | Yes               |
| 10  | Clinical and prognostic value of poststenting fractional flow reserve in acute coronary syndromes.                                                                                                     | Kasula, S., et al.     | Heart (2016) <sup>10</sup>                 | Yes               |
| 11  | Prevalence and Clinical Significance of Discordant Changes in Fractional and Coronary Flow Reserve After Elective Percutaneous Coronary Intervention.                                                  | Matsuda, J., et al.    | J Am Heart Assoc (2016) <sup>11</sup>      | Yes               |

|    |                                                                                                                                                                                                                                              |                      |                                                 |     |
|----|----------------------------------------------------------------------------------------------------------------------------------------------------------------------------------------------------------------------------------------------|----------------------|-------------------------------------------------|-----|
| 12 | Cutoff Value and Long-Term Prediction of Clinical Events by FFR Measured Immediately After Implantation of a Drug-Eluting Stent in Patients With Coronary Artery Disease: 1- to 3-Year Results From the DKCRUSH VII Registry Study.          | Li, S. J., et al.    | JACC Cardiovasc Interv (2017) <sup>12</sup>     | Yes |
| 13 | Prognostic Value of Fractional Flow Reserve Measured Immediately After Drug-Eluting Stent Implantation.                                                                                                                                      | Piroth, Z., et al.   | Circ Cardiovasc Interv (2017) <sup>13</sup>     | Yes |
| 14 | Prognostic Implications of Relative Increase and Final Fractional Flow Reserve in Patients With Stent Implantation.                                                                                                                          | Lee, J. M., et al.   | JACC Cardiovasc Interv (2018) <sup>14</sup>     | Yes |
| 15 | Clinical significance of concordance or discordance between fractional flow reserve and coronary flow reserve for coronary physiological indices, microvascular resistance, and prognosis after elective percutaneous coronary intervention. | Usui, E., et al.     | EuroIntervention (2018) <sup>15</sup>           | Yes |
| 16 | Impact of Post-Percutaneous Coronary Intervention Fractional Flow Reserve Measurement on Procedural Management and Clinical Outcomes: The REPEAT-FFR Study.                                                                                  | Azzalini, L., et al. | J Invasive Cardiol (2019) <sup>16</sup>         | Yes |
| 17 | Incremental Prognostic Value of Post-Intervention Pd/Pa in Patients Undergoing Ischemia-Driven Percutaneous Coronary Intervention.                                                                                                           | Hakeem, A., et al.   | JACC Cardiovasc Interv (2019) <sup>17</sup>     | Yes |
| 18 | Prognostic value of post-intervention fractional flow reserve after intravascular ultrasound-guided second-generation drug-eluting coronary stenting.                                                                                        | Hoshino, M., et al.  | EuroIntervention (2019) <sup>18</sup>           | Yes |
| 19 | Influence of target vessel on prognostic relevance of fractional flow reserve after coronary stenting.                                                                                                                                       | Hwang, D., et al.    | EuroIntervention (2019) <sup>19</sup>           | Yes |
| 20 | Usefulness of the trans-stent fractional flow reserve gradient for predicting clinical outcomes.                                                                                                                                             | Yang, H. M., et al.  | Catheter Cardiovasc Interv (2019) <sup>20</sup> | Yes |
| 21 | Role of Post-Stent Physiological Assessment in a Risk Prediction Model After Coronary Stent Implantation.                                                                                                                                    | Hwang, D., et al.    | JACC Cardiovasc Interv (2020) <sup>21</sup>     | Yes |
| 22 | Prognostic Value of Prerevascularization Fractional Flow Reserve Mediated by the Postrevascularization Level                                                                                                                                 | Hamaya, R., et al.   | JAMA Network Open (2020) <sup>22</sup>          | Yes |

|    |                                                                                                                                                |                      |                                             |     |
|----|------------------------------------------------------------------------------------------------------------------------------------------------|----------------------|---------------------------------------------|-----|
| 23 | Prognostic Implications of Post-Intervention Resting Pd/Pa and Fractional Flow Reserve in Patients With Stent Implantation.                    | Shin, D., et al.     | JACC Cardiovasc Interv (2020) <sup>23</sup> | Yes |
| 24 | Insufficient recovery of fractional flow reserve even after optimal implantation of drug-eluting stents: 3-year outcomes from the FUJI study.  | Hokama, Y., et al.   | J Cardiol (2020) <sup>24</sup>              | Yes |
| 25 | Physiological Distribution and Local Severity of Coronary Artery Disease and Outcomes After Percutaneous Coronary Intervention.                | Shin, D., et al.     | JACC Cardiovasc Interv (2021) <sup>25</sup> | Yes |
| 26 | Effect of Coronary Disease Characteristics on Prognostic Relevance of Residual Ischemia After Stent Implantation.                              | Yang, S., et al.     | Front Cardiovasc Med (2021) <sup>26</sup>   | Yes |
| 27 | Differential Prognostic Implications of Pre- and Post-Stent Fractional Flow Reserve in Patients Undergoing Percutaneous Coronary Intervention. | Zhang, J., et al.    | Korean Circ J (2022) <sup>27</sup>          | Yes |
| 28 | Impact of Poststenting Fractional Flow Reserve on Long-Term Clinical Outcomes                                                                  | Diletti, R., et al.  | Circ Cardiovasc Interv (2021) <sup>28</sup> | Yes |
| 29 | Post-stenting fractional flow reserve vs coronary angiography for optimization of percutaneous coronary intervention (TARGET-FFR).             | Collison, D., et al. | Eur Heart J (2021) <sup>29</sup>            | Yes |

**eTable 2.** List of Studies and Cohorts Included in the Post-PCI FLOW Registry

| No. | Title                                                                                                                                                                                                                               | First Author           | Cohort                                      |
|-----|-------------------------------------------------------------------------------------------------------------------------------------------------------------------------------------------------------------------------------------|------------------------|---------------------------------------------|
| 1   | The impact of fractional flow reserve measurement on clinical outcomes after transradial coronary stenting.                                                                                                                         | Leesar, M. A., et al.  | Institutional cohort from affiliated center |
| 2   | Relation of fractional flow reserve after drug-eluting stent implantation to one-year outcomes.                                                                                                                                     | Nam, C. W., et al.     | Institutional cohort from affiliated center |
| 3   | Hemodynamic changes of fractional flow reserve after double kissing crush and provisional stenting technique for true bifurcation lesions.                                                                                          | Ye, F., et al.         | Institutional cohort from affiliated center |
| 4   | Clinical implications of coronary pressure measurement after stent implantation.                                                                                                                                                    | Matsuo, A., et al.     | Institutional cohort from affiliated center |
| 5   | Relationship between fractional flow reserve and residual plaque volume and clinical outcomes after optimal drug-eluting stent implantation: insight from intravascular ultrasound volumetric analysis                              | Ito, T., et al.        | Institutional cohort from affiliated center |
| 6   | Prognostic value of fractional flow reserve: linking physiologic severity to clinical outcomes.                                                                                                                                     | Johnson, N. P., et al. | Meta-analysis                               |
| 7   | Clinical Relevance of Poststent Fractional Flow Reserve After Drug-Eluting Stent Implantation.                                                                                                                                      | Doh, J. H., et al.     | Institutional cohort from affiliated center |
| 8   | Utilizing Post-Intervention Fractional Flow Reserve to Optimize Acute Results and the Relationship to Long-Term Outcomes.                                                                                                           | Agarwal, S. K., et al. | Central Arkansas VA Health systems          |
| 9   | Clinical and prognostic value of poststenting fractional flow reserve in acute coronary syndromes.                                                                                                                                  | Kasula, S., et al.     | Central Arkansas VA Health systems          |
| 10  | Prevalence and Clinical Significance of Discordant Changes in Fractional and Coronary Flow Reserve After Elective Percutaneous Coronary Intervention.                                                                               | Matsuda, J., et al.    | Institutional cohort from affiliated center |
| 11  | Cutoff Value and Long-Term Prediction of Clinical Events by FFR Measured Immediately After Implantation of a Drug-Eluting Stent in Patients With Coronary Artery Disease: 1- to 3-Year Results From the DKCRUSH VII Registry Study. | Li, S. J., et al.      | DKCRUSH VII                                 |

|    |                                                                                                                                                                                                                                              |                      |                                                                                                                                                |
|----|----------------------------------------------------------------------------------------------------------------------------------------------------------------------------------------------------------------------------------------------|----------------------|------------------------------------------------------------------------------------------------------------------------------------------------|
| 12 | Prognostic Value of Fractional Flow Reserve Measured Immediately After Drug-Eluting Stent Implantation.                                                                                                                                      | Piroth, Z., et al.   | FAME 1 and FAME 2                                                                                                                              |
| 13 | Prognostic Implications of Relative Increase and Final Fractional Flow Reserve in Patients With Stent Implantation.                                                                                                                          | Lee, J. M., et al.   | COE PERSPECTIVE                                                                                                                                |
| 14 | Clinical significance of concordance or discordance between fractional flow reserve and coronary flow reserve for coronary physiological indices, microvascular resistance, and prognosis after elective percutaneous coronary intervention. | Usui, E., et al.     | Institutional cohort from affiliated center                                                                                                    |
| 15 | Impact of Post-Percutaneous Coronary Intervention Fractional Flow Reserve Measurement on Procedural Management and Clinical Outcomes: The REPEAT-FFR Study.                                                                                  | Azzalini, L., et al. | Institutional cohort from affiliated center                                                                                                    |
| 16 | Incremental Prognostic Value of Post-Intervention Pd/Pa in Patients Undergoing Ischemia-Driven Percutaneous Coronary Intervention.                                                                                                           | Hakeem, A., et al.   | Central Arkansas VA Health systems                                                                                                             |
| 17 | Prognostic value of post-intervention fractional flow reserve after intravascular ultrasound-guided second-generation drug-eluting coronary stenting.                                                                                        | Hoshino, M., et al.  | Institutional cohort from affiliated center                                                                                                    |
| 18 | Influence of target vessel on prognostic relevance of fractional flow reserve after coronary stenting.                                                                                                                                       | Hwang, D., et al.    | COE PERSPECTIVE                                                                                                                                |
| 19 | Usefulness of the trans-stent fractional flow reserve gradient for predicting clinical outcomes.                                                                                                                                             | Yan-g, H. M., et al. | Institutional cohort from affiliated center                                                                                                    |
| 20 | Role of Post-Stent Physiological Assessment in a Risk Prediction Model After Coronary Stent Implantation.                                                                                                                                    | Hwang, D., et al.    | International Post-PCI FFR registry (DKCRUSH VII, COE PERSPECTIVE, 3V FFR FRIENDS, Institutional cohort from Tsuchiura Kyodo General Hospital) |
| 21 | Prognostic Value of Prerevascularization Fractional Flow Reserve Mediated by the Postrevascularization Level                                                                                                                                 | Hamaya, R., et al.   | International Post-PCI FFR registry (DKCRUSH VII, COE PERSPECTIVE, 3V FFR FRIENDS, Institutional cohort from Tsuchiura Kyodo General Hospital) |
| 22 | Prognostic Implications of Post-Intervention Resting Pd/Pa and Fractional Flow Reserve in Patients With Stent Implantation.                                                                                                                  | Shin, D., et al.     | PERSPECTIVE PCI                                                                                                                                |

|    |                                                                                                                                                |                      |                                                                                                                                                |
|----|------------------------------------------------------------------------------------------------------------------------------------------------|----------------------|------------------------------------------------------------------------------------------------------------------------------------------------|
| 23 | Insufficient recovery of fractional flow reserve even after optimal implantation of drug-eluting stents: 3-year outcomes from the FUJI study.  | Hokama, Y., et al.   | FUJI study                                                                                                                                     |
| 24 | Physiological Distribution and Local Severity of Coronary Artery Disease and Outcomes After Percutaneous Coronary Intervention.                | Shin, D., et al.     | PERSPECTIVE PCI                                                                                                                                |
| 25 | Effect of Coronary Disease Characteristics on Prognostic Relevance of Residual Ischemia After Stent Implantation.                              | Yang, S., et al.     | International Post-PCI FFR registry (DKCRUSH VII, COE PERSPECTIVE, 3V FFR FRIENDS, Institutional cohort from Tsuchiura Kyodo General Hospital) |
| 26 | Differential Prognostic Implications of Pre- and Post-Stent Fractional Flow Reserve in Patients Undergoing Percutaneous Coronary Intervention. | Zhang, J., et al.    | International Post-PCI FFR registry (DKCRUSH VII, COE PERSPECTIVE, 3V FFR FRIENDS, Institutional cohort from Tsuchiura Kyodo General Hospital) |
| 27 | Impact of Poststenting Fractional Flow Reserve on Long-Term Clinical Outcomes                                                                  | Diletti, R., et al.  | FFR-SEARCH                                                                                                                                     |
| 28 | Post-stenting fractional flow reserve vs coronary angiography for optimization of percutaneous coronary intervention (TARGET-FFR).             | Collison, D., et al. | TARGET-FFR                                                                                                                                     |

**eTable 3.** Number of Patients Provided by Each Cohort and Number of Patients Included in the Master Data Set

| No. | Study                              | Provided patient number | Included patient number | Specific comments                                                                                                                        |
|-----|------------------------------------|-------------------------|-------------------------|------------------------------------------------------------------------------------------------------------------------------------------|
| 1   | FAME 1 and FAME 2                  | 639                     | 639                     | Full data was available.                                                                                                                 |
| 2   | Central Arkansas VA Health systems | 574                     | 450                     | Exclude patients after PTCA and BMS                                                                                                      |
| 3   | DKCRUSH VII                        | 780                     | 774                     | Only data from the centers that agreed to provide it were collected.                                                                     |
| 4   | COE PERSPECTIVE                    | 835                     | 822                     | Excluded patients with missing data                                                                                                      |
| 5   | 3V FFR FRIENDS                     | 266                     | 258                     | Patients with post-PCI FFR data were included.<br>Excluded patients with missing data                                                    |
| 6   | Kakuta, et al.                     | 347                     | 346                     | Excluded patients with missing data                                                                                                      |
| 7   | PERSPECTIVE PCI                    | 268                     | 268                     | PERSPECTIVE PCI has overlapped the study population with the COE-PERSPECTIVE registry. Half of the data was from Samsung Medical center. |
| 8   | FUJI study                         | 218                     | 218                     | Full data was available                                                                                                                  |
| 9   | Johnson, N. P., et al.             | 966                     | 152                     | Patients after PTCA or BMS implantation were excluded.<br>Patients without clear outcome data were excluded.                             |
| 10  | Leesar, M. A., et al.              | 66                      | 0                       | There were no data for stent information.                                                                                                |
| 11  | Matsuo, A., et al.                 | 100                     | 65                      | Patients after PTCA or BMS implantation were excluded.<br>Patients without clear outcome data were excluded.                             |
| 12  | Ito, T., et al.                    | 97                      | 97                      | Full data was available.                                                                                                                 |
| 13  | Doh, J. H., et al.                 | 107                     | 107                     | Full data was available.                                                                                                                 |

|    |                      |     |     |                                                                                            |
|----|----------------------|-----|-----|--------------------------------------------------------------------------------------------|
| 14 | Azzalini, L., et al. | 65  | 58  | Patients after DEB or BRS implantation were excluded.                                      |
| 15 | Yang, H. M., et al.  | 135 | 135 | Full data was available.                                                                   |
| 16 | FFR-SEARCH           | 959 | 628 | Exclude patients with ST-elevation myocardial infarction or with graft vessel post-PCI FFR |
| 17 | TARGET-FFR           | 260 | 260 | Full data was available.                                                                   |

Abbreviations: BMS, bare-metal stent; BRS, bioresorbable scaffold; FFR, fractional flow reserve; PCI, percutaneous coronary intervention; PTCA, percutaneous transluminal coronary angioplasty.



**eTable 4.** Description of the Included Cohorts

| No. | Cohort                             | Study type                     | Time perspective | Recruitment center                                | Study population                                                                                                        | Follow-up duration | Stent type | Angiographic successful PCI |
|-----|------------------------------------|--------------------------------|------------------|---------------------------------------------------|-------------------------------------------------------------------------------------------------------------------------|--------------------|------------|-----------------------------|
| 1   | FAME 1 and FAME 2                  | Observational cohort from RCTs | prospective      | FAME 1 from 20 centers and FAME 2 from 28 centers | FAME 1 (352): Angiographic multivessel CAD + FFR-guided arm<br>FAME 2 (287): SIHD or stabilized ACS with 1, 2, or 3 VD. | 2 years            | DES        | Yes                         |
| 2   | Central Arkansas VA Health systems | Observational cohort           | retrospective    | 1 center                                          | 390 SIHD or 184 ACS patients                                                                                            | 31 months          | BMS/DES    | Yes                         |
| 3   | DKCRUSH VII                        | Observational cohort           | prospective      | 9 centers                                         | 1,496 patients                                                                                                          | 3 years            | DES        | Yes                         |
| 4   | COE PERSPECTIVE                    | Observational cohort           | prospective      | 9 centers                                         | 452 SIHD patients, 383 ACS patients                                                                                     | 2 years            | DES        | Yes                         |
| 5   | 3V FFR FRIENDS                     | Observational cohort           | prospective      | 4 centers                                         | 882 SIHD patients, 254 ACS patients                                                                                     | 2 years            | DES        | Yes                         |
| 6   | Kakuta, et al.                     | Observational cohort           | prospective      | 1 center                                          | 311 SIHD patients, 35 ACS patients                                                                                      | 2 years            | DES        | Yes                         |
| 7   | PERSPECTIVE PCI                    | Observational cohort           | prospective      | 5 centers                                         | 309 SIHD patients, 279 ACS patients                                                                                     | 2 years            | DES        | Yes                         |
| 8   | FUJI study                         | Observational cohort           | prospective      | 17 centers                                        | 200 SIHD patients, 18 UA patients                                                                                       | 31.4 months        | DES        | Yes                         |
| 9   | Johnson, N. P., et al.             | Meta-analysis                  | retrospective    | From 15 studies                                   | 966 patients                                                                                                            | Median 12 months-  | BMS/DES    | NA                          |
| 10  | Leesar, M. A., et al.              | Observational cohort           | prospective      | 1 center                                          | 66 SIHD patients                                                                                                        | 2 years            | BMS/DES    | Yes                         |
| 11  | Matsuo, A., et al.                 | Observational cohort           | prospective      | 1 center                                          | 69 patients                                                                                                             | 6 months           | BMS/DES    | Yes                         |

|    |                      |                             |               |          |                                     |             |             |     |
|----|----------------------|-----------------------------|---------------|----------|-------------------------------------|-------------|-------------|-----|
| 12 | Ito, T., et al.      | Observational cohort        | retrospective | 1 center | 89 SIHD patients, 8 UA patients     | 17.8 months | DES         | Yes |
| 13 | Doh, J. H., et al.   | Observational cohort        | prospective   | 1 center | 72 SIHD patients, 35 ACS patients   | 3 years     | DES         | Yes |
| 14 | Azzalini, L., et al. | Observational cohort        | prospective   | 1 center | 50 SIHD patients, 15 ACS patients   | 1 year      | DES/BRS/DEB | Yes |
| 15 | Yang, H. M., et al.  | Observational cohort        | retrospective | 1 center | 57 SIHD patients, 78 UA patients    | 6 years     | DES         | Yes |
| 16 | FFR-SEARCH           | Observational cohort        | prospective   | 1 center | 284 SIHD patients, 344 ACS patients | 2 years     | DES         | Yes |
| 17 | TARGET-FFR           | Randomized controlled trial | prospective   | 1 center | 72 SIHD patients, 188 ACS patients  | 2 years     | DES         | Yes |

Abbreviations: ACS, acute coronary syndrome; BMS, bare-metal stent; BRS, bioresorbable scaffold; CAD, coronary artery disease; DEB, drug-eluting balloon; DES, drug-eluting stent; FFR, fractional flow reserve; NA, not available; PCI, percutaneous coronary intervention; RCT, randomized controlled trial; SIHD, stable ischemic heart disease; UA, unstable angina; VD, vessel disease.

**eTable 5.** The Newcastle-Ottawa Scale for Assessing the Quality of Observational Cohorts

| <b>Cohort</b>                      | <b>Selection<sup>*</sup></b> | <b>Comparability<sup>†</sup></b> | <b>Outcome<sup>‡</sup></b> | <b>Quality</b> |
|------------------------------------|------------------------------|----------------------------------|----------------------------|----------------|
| FAME 1 and FAME 2                  | ★★★                          | ★★                               | ★★★                        | 8/8            |
| Central Arkansas VA Health systems | ★★★                          | ★                                | ★★★                        | 7/8            |
| DKCRUSH VII                        | ★★★                          | ★★                               | ★★★                        | 8/8            |
| COE PERSPECTIVE                    | ★★★                          | ★★                               | ★★★                        | 8/8            |
| 3V FFR FRIENDS                     | ★★★                          | ★★                               | ★★★                        | 8/8            |
| Kakuta et al.                      | ★★★                          | ★★                               | ★★★                        | 8/8            |
| PERSPECTIVE PCI                    | ★★★                          | ★★                               | ★★★                        | 8/8            |
| FUJI study                         | ★★★                          | ★★                               | ★★★                        | 8/8            |
| Johnson, N. P., et al.             | ★★                           |                                  | ★★                         | 4/8            |
| Leesar, M. A., et al.              | ★★                           | ★                                | ★★                         | 5/8            |
| Matsuo, A., et al.                 | ★★                           | ★★                               | ★★                         | 6/8            |
| Ito, T., et al.                    | ★★★                          | ★                                | ★★★                        | 7/8            |
| Doh, J. H., et al.                 | ★★★                          | ★★                               | ★★★                        | 8/8            |
| Azzalini, L., et al.               | ★★★                          | ★★                               | ★★                         | 7/8            |
| Yang, H. M., et al.                | ★★                           | ★                                | ★★★                        | 6/8            |
| FFR-SEARCH                         | ★★★                          | ★★                               | ★★★                        | 8/8            |
| TARGET-FFR                         | ★★★                          | ★★                               | ★★★                        | 8/8            |

<sup>\*</sup>Selection process was assessed with representativeness of the cohort, ascertainment of exposure of the cohort and presence of all interested outcomes.

<sup>†</sup>Comparability was assessed with design of cohort (prospective/retrospective) and availability of risk factors.

<sup>‡</sup>Outcome was assessed with whether outcomes were clearly provided, duration of follow-up and completeness of follow-up.

The quality of each study was assessed based on a Newcastle-Ottawa scale. We assessed each study's selection process, comparability, and outcome for a maximum total of 8 points (3 points for selection, 2 points for comparability, and 3 points for outcome). Studies were ranked high if they had a score of >5, moderate if they had a score of 3 to 5, and low if they had a score of <3.

**eTable 6. Baseline Characteristics of the Study Population**

|                                    |                  |
|------------------------------------|------------------|
| <b>General characteristics</b>     |                  |
| Age, years                         | 64.4± 10.1       |
| Male                               | 4,141 (78.5%)    |
| <b>Cardiovascular risk factors</b> |                  |
| Hypertension                       | 3,628 (68.8%)    |
| Diabetes mellitus                  | 1,799 (34.1%)    |
| Hypercholesterolemia               | 3,140 (59.6%)    |
| Current smoker                     | 1,687 (32.0%)    |
| Previous MI                        | 1,020 (20.4%)    |
| <b>Clinical presentations</b>      |                  |
| Acute coronary syndrome            | 2,064 (39.5%)    |
| Stable coronary artery disease     | 3,156 (60.5%)    |
| <b>Target vessel</b>               |                  |
| LAD                                | 3,565 (67.8%)    |
| LCX                                | 691 (13.1%)      |
| RCA                                | 999 (19.0%)      |
| <b>Pre-PCI FFR</b>                 | 0.71 (0.61-0.77) |
| <b>Post-PCI FFR</b>                | 0.88 (0.84-0.93) |

Values are mean ± standard deviation, median (interquartile ranges, 25th-75th), or n (%).

Abbreviations: FFR, fractional flow reserve; LAD, left anterior descending artery; LCX, left circumflex artery; MI, myocardial infarction; PCI, percutaneous coronary intervention; RCA, right coronary artery.

**eTable 7. Per-vessel Specific Characteristics and Outcomes**

|                                     |                   |
|-------------------------------------|-------------------|
| <b>Vessel characteristics</b>       |                   |
| <b>Total number of vessels</b>      | 5,869             |
| <b>Vessel location</b>              |                   |
| LAD                                 | 3,697 (63.2%)     |
| LCX                                 | 927 (15.9%)       |
| RCA                                 | 1,223 (20.9%)     |
| <b>Pre-PCI FFR</b>                  | 0.71 (0.61-0.77)  |
| <b>Post-PCI FFR</b>                 | 0.89 (0.84-0.94)  |
| <b>Vessel-specific outcome</b>      |                   |
| Target vessel myocardial infarction | 63/5,796 (1.2%)*  |
| Target vessel revascularization     | 309/5,868 (5.9%)* |

\*The cumulative incidence of clinical outcomes at 2 years is presented as Kaplan-Meier estimates.

Abbreviations: FFR, fractional flow reserve; LAD, left anterior descending artery; LCX, left circumflex artery; PCI, percutaneous coronary intervention; RCA, right coronary artery.

**eTable 8.** Cumulative Incidence and Risk of Clinical Events According to Post-PCI FFR Strata

|                                            | Event (%)*      | HR (95% CI)         | p-value | Adjusted HR (95% CI) † | p-value |
|--------------------------------------------|-----------------|---------------------|---------|------------------------|---------|
| <b>TVF</b>                                 |                 |                     |         |                        |         |
| <b>0.95&lt;Post-PCI FFR (n=745)</b>        | 38/737 (5.5%)   | Reference           |         |                        |         |
| <b>0.90&lt;Post-PCI FFR≤0.95 (n=1,290)</b> | 69/1,272 (6.1%) | 1.080 (0.726-1.606) | 0.70    | 1.052 (0.706-1.569)    | 0.80    |
| <b>0.85&lt;Post-PCI FFR≤0.90 (n=1,470)</b> | 93/1,451 (7.1%) | 1.329 (0.910-1.941) | 0.14    | 1.333 (0.911-1.950)    | 0.14    |
| <b>0.80&lt;Post-PCI FFR≤0.85 (n=1,095)</b> | 80/1,075 (8.3%) | 1.649 (1.118-2.432) | 0.01    | 1.604 (1.081-2.381)    | 0.02    |
| <b>Post-PCI FFR≤0.80 (n=677)</b>           | 60/669 (10.1%)  | 2.106 (1.397-3.176) | <0.001  | 2.108 (1.385-3.209)    | <0.001  |
| <b>Cardiac death or TVMI</b>               |                 |                     |         |                        |         |
| <b>0.95&lt;Post-PCI FFR (n=745)</b>        | 13/737 (1.9%)   | Reference           |         |                        |         |
| <b>0.90&lt;Post-PCI FFR≤0.95 (n=1,290)</b> | 25/1,272 (2.2%) | 1.251(0.634-2.471)  | 0.52    | 1.255 (0.633-2.490)    | 0.52    |
| <b>0.85&lt;Post-PCI FFR≤0.90 (n=1,470)</b> | 29/1,451 (2.2%) | 1.353 (0.682-2.684) | 0.39    | 1.356 (0.681-2.700)    | 0.39    |
| <b>0.80&lt;Post-PCI FFR≤0.85 (n=1,095)</b> | 23/1,075 (2.4%) | 1.646 (0.783-3.460) | 0.19    | 1.636 (0.772-3.467)    | 0.20    |
| <b>Post-PCI FFR≤0.80 (n=677)</b>           | 21/669 (3.6%)   | 2.590 (1.141-5.880) | 0.02    | 2.559 (1.116-5.867)    | 0.03    |

\*The cumulative incidence of clinical outcomes at 2 years is presented as Kaplan-Meier estimates.

†The following patient risk factors were included in the multivariable-adjusted mixed-effects Cox proportional hazard regression model: age, sex, hypertension, diabetes mellitus, hypercholesterolemia, and acute coronary syndrome.

Abbreviations: CI, confidence interval; FFR, fractional flow reserve; HR, hazard ratio; PCI, percutaneous coronary intervention; TVF, target vessel failure; TVMI, target vessel myocardial infarction.

**eTable 9.** The Risk of Clinical Events at 2 Years per Post-PCI FFR 0.01 Decrease in Subgroups

|                              | Patient number | Event (%)* | HR (95% CI)         | p-value | Adjusted HR (95% CI) † | p-value | Interaction p-value |
|------------------------------|----------------|------------|---------------------|---------|------------------------|---------|---------------------|
| <b>TVF</b>                   |                |            |                     |         |                        |         |                     |
| <b>Age≥65 years</b>          | 2,656          | 153 (8.0%) | 1.026 (0.996-1.056) | 0.09    | 1.024 (0.995-1.054)    | 0.09    | 0.92                |
| <b>Age&lt;65years</b>        | 2,620          | 187 (6.5%) | 1.032 (1.009-1.054) | 0.005   | 1.034 (1.010-1.059)    | 0.005   |                     |
| <b>Male</b>                  | 4,141          | 267 (7.3%) | 1.027 (1.008-1.047) | 0.006   | 1.027 (1.005-1.050)    | 0.02    | 0.55                |
| <b>Female</b>                | 1,135          | 73 (7.1%)  | 1.061 (1.021-1.102) | 0.002   | 1.045 (1.009-1.081)    | 0.01    |                     |
| <b>With HTN</b>              | 3,628          | 261 (8.1%) | 1.038 (1.021-1.056) | <0.001  | 1.040 (1.022-1.058)    | <0.001  | 0.51                |
| <b>Without HTN</b>           | 1,643          | 79 (5.3%)  | 1.021 (0.991-1.051) | 0.17    | 1.016 (0.981-1.054)    | 0.37    |                     |
| <b>With DM</b>               | 1,799          | 144 (9.3%) | 1.017 (0.986-1.049) | 0.27    | 1.015 (0.982-1.049)    | 0.38    | 0.86                |
| <b>Without DM</b>            | 3,475          | 196 (6.2%) | 1.032 (1.011-1.054) | 0.003   | 1.033 (1.011-1.055)    | 0.003   |                     |
| <b>ACS</b>                   | 2,064          | 141 (7.4%) | 1.031 (1.006-1.056) | 0.01    | 1.029 (1.004-1.055)    | 0.02    | 0.40                |
| <b>Non-ACS</b>               | 3,156          | 195 (7.1%) | 1.037 (1.017-1.058) | <0.001  | 1.039 (1.018-1.061)    | <0.001  |                     |
| <b>Cardiac death or TVMI</b> |                |            |                     |         |                        |         |                     |
| <b>Age≥65 years</b>          | 2,656          | 67 (2.9%)  | 1.034 (0.989-1.080) | 0.14    | 1.032 (0.987-1.080)    | 0.16    | 0.47                |
| <b>Age&lt;65 years</b>       | 2,620          | 44 (1.9%)  | 1.026 (0.982-1.071) | 0.26    | 1.025 (0.980-1.071)    | 0.28    |                     |
| <b>Male</b>                  | 4,141          | 89 (2.5%)  | 1.029 (0.993-1.067) | 0.11    | 1.030 (0.992-1.068)    | 0.12    | 0.34                |
| <b>Female</b>                | 1,135          | 22 (2.1%)  | 1.070 (1.009-1.134) | 0.02    | 1.056 (0.994-1.122)    | 0.08    |                     |
| <b>With HTN</b>              | 3,628          | 85 (2.7%)  | 1.029 (0.995-1.064) | 0.10    | 1.029 (0.994-1.066)    | 0.11    | 0.68                |
| <b>Without HTN</b>           | 1,643          | 26 (1.8%)  | 1.046 (0.987-1.108) | 0.13    | 1.049 (0.987-1.114)    | 0.12    |                     |
| <b>With DM</b>               | 1,799          | 53 (3.4%)  | 1.007 (0.963-1.053) | 0.76    | 1.012 (0.967-1.060)    | 0.60    | 0.31                |
| <b>Without DM</b>            | 3,475          | 58 (1.9%)  | 1.050 (1.010-1.092) | 0.02    | 1.048 (1.007-1.091)    | 0.02    |                     |
| <b>ACS</b>                   | 2,064          | 48 (2.6%)  | 1.038 (0.982-1.098) | 0.18    | 1.031 (0.976-1.090)    | 0.27    | 0.50                |
| <b>Non-ACS</b>               | 3,156          | 63 (2.3%)  | 1.017 (0.981-1.054) | 0.36    | 1.018 (0.982-1.056)    | 0.33    |                     |

\*The cumulative incidence of clinical outcomes at 2 years is presented as Kaplan-Meier estimates.

†The following patient risk factors were included in the multivariable-adjusted mixed-effects Cox proportional hazard regression model: age, sex, hypertension, diabetes mellitus, hypercholesterolemia, and acute coronary syndrome.

Abbreviations: ACS, acute coronary intervention; CI, confidence interval; DM, diabetes mellitus; FFR, fractional flow reserve; HR, hazard ratio; HTN, hypertension; PCI, percutaneous coronary intervention; TVF, target vessel failure; TVMI, target vessel myocardial infarction.

**eTable 10.** Predictors of TVF and Cardiac Death or TVMI

| <b>Variables</b>                       | <b>Adjusted HR*</b> | <b>95% CI</b> | <b>p-value</b> |
|----------------------------------------|---------------------|---------------|----------------|
| <b>TVF</b>                             |                     |               |                |
| <b>Age, per 1 year increase</b>        | 1.012               | 1.001-1.024   | 0.03           |
| <b>Male</b>                            | 1.013               | 0.772-1.328   | 0.93           |
| <b>Hypertension</b>                    | 1.317               | 1.006-1.725   | 0.04           |
| <b>Diabetes mellitus</b>               | 1.356               | 1.083-1.699   | 0.008          |
| <b>Hypercholesterolemia</b>            | 0.996               | 0.786-1.262   | 0.97           |
| <b>Acute coronary syndrome</b>         | 1.360               | 1.065-1.736   | 0.01           |
| <b>Post-PCI FFR, per 0.01 decrease</b> | 1.035               | 1.020-1.051   | <0.001         |
| <b>Cardiac death or TVMI</b>           |                     |               |                |
| <b>Age, per 1 year increase</b>        | 1.038               | 1.017-1.060   | <0.001         |
| <b>Male</b>                            | 1.171               | 0.720-1.905   | 0.52           |
| <b>Hypertension</b>                    | 1.151               | 0.718-1.845   | 0.56           |
| <b>Diabetes mellitus</b>               | 1.814               | 1.225-2.687   | 0.003          |
| <b>Hypercholesterolemia</b>            | 0.981               | 0.646-1.491   | 0.93           |
| <b>Acute coronary syndrome</b>         | 1.680               | 1.094-2.580   | 0.02           |
| <b>Post-PCI FFR, per 0.01 decrease</b> | 1.034               | 1.001-1.068   | 0.049          |

The following patient risk factors were included in the multivariable-adjusted mixed-effects Cox proportional hazard regression model: age, sex, hypertension, diabetes mellitus, hypercholesterolemia, and acute coronary syndrome.

Abbreviations: CI, confidence interval; FFR, fractional flow reserve; HR, hazard ratio; PCI, percutaneous coronary intervention; TVF, target vessel failure; TVMI, target vessel myocardial infarction.



**eTable 11.** Clinical Events According to Post-PCI FFR Cut-off Value

|                              | Post-PCI FFR     |                  | HR<br>(95% CI)      | p-value | Adjusted HR*<br>(95% CI) | p-value |
|------------------------------|------------------|------------------|---------------------|---------|--------------------------|---------|
|                              | ≤0.86            | >0.86            |                     |         |                          |         |
| <b>TVF</b>                   | 165/2,021 (9.1%) | 175/3,183 (6.1%) | 1.658 (1.334-2.062) | <0.001  | 1.575 (1.241-1.999)      | <0.001  |
| <b>Cardiac death or TVMI</b> | 52/2,021 (2.9%)  | 59/3,183 (2.1%)  | 1.649 (1.109-2.452) | 0.01    | 1.562 (1.035-2.355)      | 0.03    |
| Cardiac death                | 33/2,055 (1.9%)  | 31/3,219 (1.1%)  | 1.829 (1.107-3.020) | 0.02    | 1.748 (1.058-2.890)      | 0.03    |
| TVMI                         | 23/2,023 (1.2%)  | 34/3,184(1.2%)   | 1.450 (0.782-2.686) | 0.24    | 1.425 (0.767-2.646)      | 0.26    |
| TVR                          | 140/2,056 (7.7%) | 145/3,220 (5.0%) | 1.655 (1.294-2.119) | <0.001  | 1.619 (1.267-2.067)      | <0.001  |
|                              | Post-PCI FFR     |                  | HR<br>(95% CI)      | p-value | Adjusted HR*<br>(95% CI) | p-value |
|                              | ≤0.80            | >0.80            |                     |         |                          |         |
| <b>TVF</b>                   | 60/669 (10.1%)   | 280/4,535 (6.8%) | 1.524 (1.123-2.069) | 0.007   | 1.509 (1.102-2.067)      | 0.01    |
| <b>Cardiac death or TVMI</b> | 21/669 (3.6%)    | 90/4,535 (2.2%)  | 1.820 (1.079-3.068) | 0.03    | 1.821 (1.080-3.072)      | 0.03    |
| Cardiac death                | 12/677(2.1%)     | 52/4,597 (1.3%)  | 1.610 (0.834-3.107) | 0.16    | 1.668 (0.876-3.176)      | 0.12    |
| TVMI                         | 10/669 (1.7%)    | 47/4,538 (1.1%)  | 2.025 (0.959-4.276) | 0.06    | 2.103 (0.996-4.441)      | 0.05    |
| TVR                          | 51/677 (8.5%)    | 234/4,599 (5.7%) | 1.629 (1.192-2.226) | 0.002   | 1.579 (1.132-2.204)      | 0.007   |

The following patient risk factors were included in the multivariable-adjusted mixed-effects Cox proportional hazard regression model: age, sex, hypertension, diabetes mellitus, hypercholesterolemia, and acute coronary syndrome.

Abbreviations: CI, confidence interval; FFR, fractional flow reserve; HR, hazard ratio; PCI, percutaneous coronary intervention; TVF, target vessel failure; TVMI, target vessel myocardial infarction; TVR, target vessel revascularization.

eFigure 1. Flow chart of study selection process

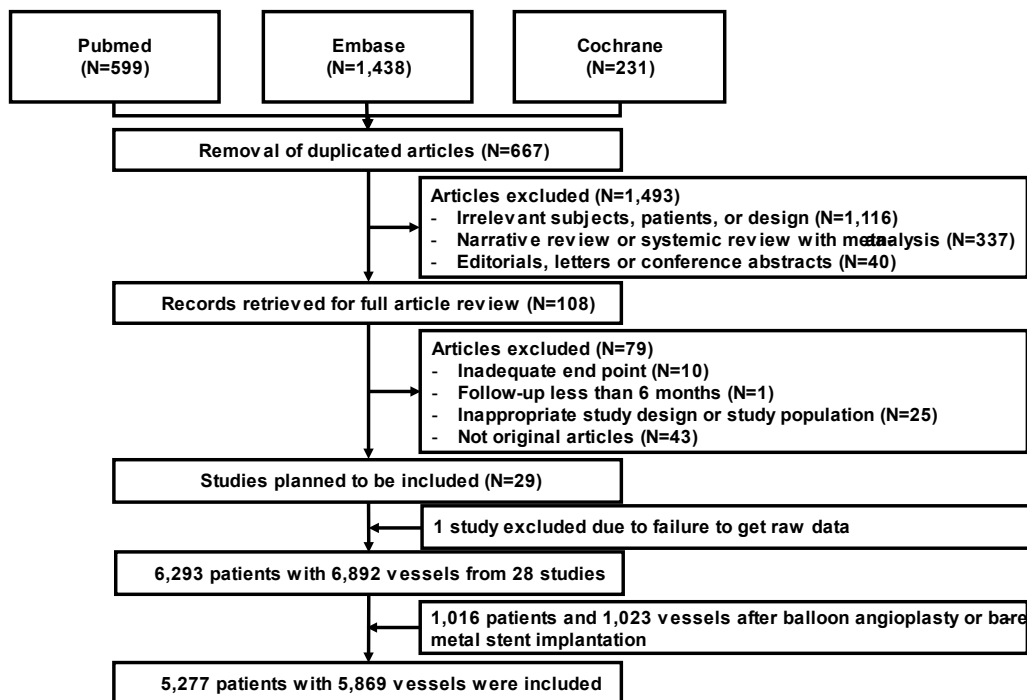

Study flow chart following the guideline of PRISMA-IPD (Preferred Reporting Items for Systematic Review and Meta-analysis of Individual Participant Data).

eFigure 2. Hazard ratios of clinical events according to postPCI FFR strata

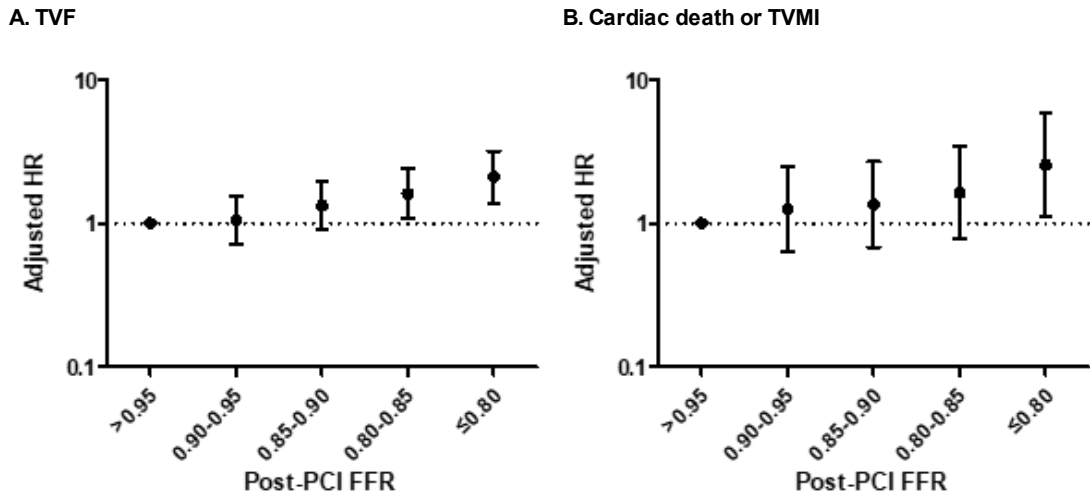

With the patients with post-PCI FFR over 0.95 as a reference, the risks of TVF (A) and cardiac death or TVMI (B) at 2 years are presented. The risks are presented as adjusted HR by multivariable-adjusted mixed-effects Cox proportional hazard model.

Abbreviations: FFR, fractional flow reserve; HR, hazard ratio; PCI, percutaneous coronary intervention; TVF, target vessel failure; TVMI, target vessel myocardial infarction.

**eFigure 3. The risks of clinical events per post-PCI FFR 0.01 decrease according to subgroups**

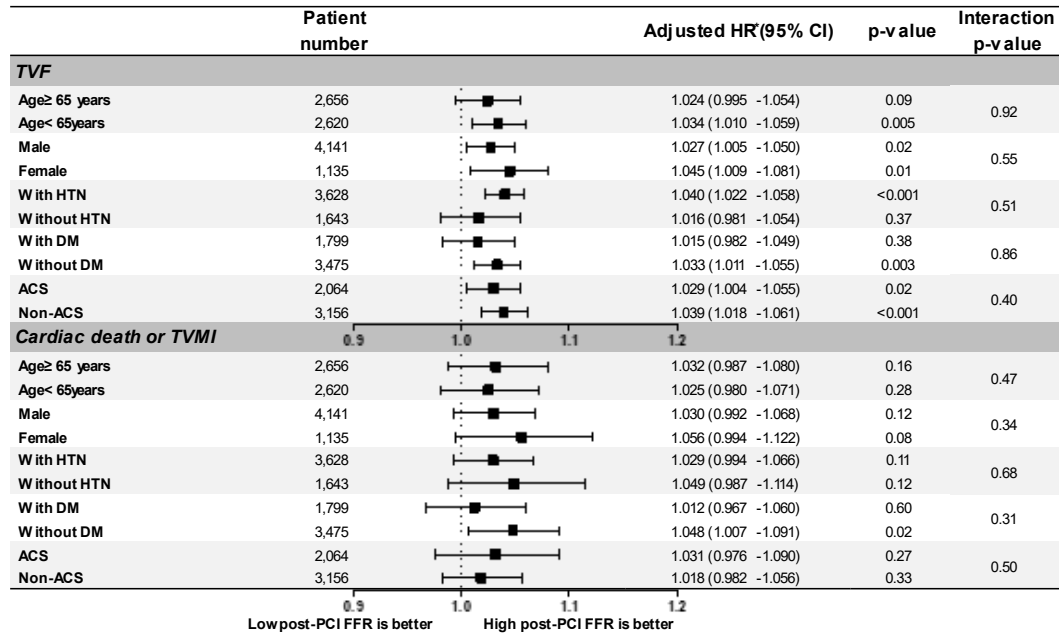

Prespecified subgroup analyses for age, sex, hypertension, diabetes mellitus, and clinical diagnosis show consistent results with the main findings.

Abbreviations: ACS, acute coronary syndrome; CI, confidence interval; DM, diabetes mellitus; FFR, fractional flow reserve; HR, hazard ratio; HTN, hypertension; PCI, percutaneous coronary intervention; TVF, target vessel failure; TVMI, target vessel myocardial infarction.

eFigure 4. Optimal cut-off values of post-PCI FFR for predicting future events

A. TVF

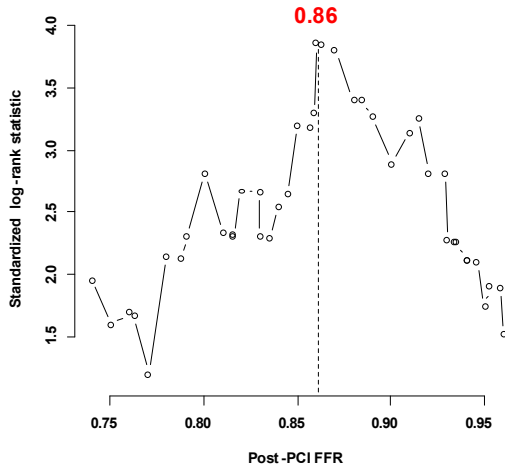

B. Cardiac death or TVMI

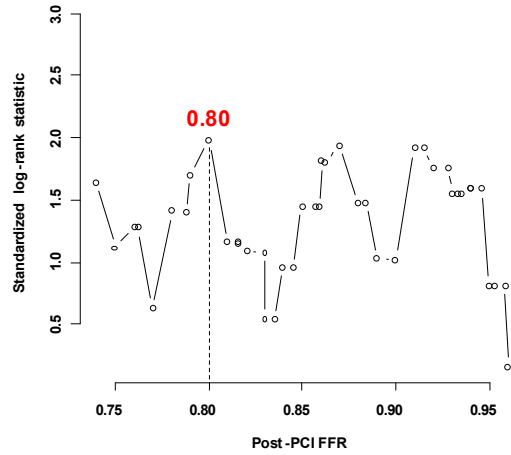

The optimal cut-off values of post-PCI FFR were calculated based on maximizing the difference of log-rank statistics for TVF and cardiac death or TVMI at 2 years.

Abbreviations: FFR, fractional flow reserve; PCI, percutaneous coronary intervention; TVF, target vessel failure; TVMI, target vessel myocardial infarction.

## References

1. Leesar MA, Satran A, Yalamanchili V, Helmy T, Abdul-Waheed M and Wongpraparut N. The impact of fractional flow reserve measurement on clinical outcomes after transradial coronary stenting. *EuroIntervention*. 2011;7:917-23.
2. Nam CW, Hur SH, Cho YK, Park HS, Yoon HJ, Kim H, Chung IS, Kim YN, Kim KB, Doh JH, Koo BK, Tahk SJ and Fearon WF. Relation of fractional flow reserve after drug-eluting stent implantation to one-year outcomes. *Am J Cardiol*. 2011;107:1763-7.
3. Ye F, Chen SL, Zhang JJ, Zhu ZS, Kan J, Tian NL, Lin S, Liu ZZ, You W, Xu HM and Xu J. Hemodynamic changes of fractional flow reserve after double kissing crush and provisional stenting technique for true bifurcation lesions. *Chin Med J (Engl)*. 2012;125:2658-62.
4. Matsuo A, Fujita H, Tanigaki T, Shimonaga T, Ueoka A, Tsubakimoto Y, Sakatani T, Kimura S, Inoue K and Kitamura M. Clinical implications of coronary pressure measurement after stent implantation. *Cardiovasc Interv Ther*. 2013;28:170-7.
5. Ito T, Tani T, Fujita H and Ohte N. Relationship between fractional flow reserve and residual plaque volume and clinical outcomes after optimal drug-eluting stent implantation: insight from intravascular ultrasound volumetric analysis. *Int J Cardiol*. 2014;176:399-404.
6. Johnson NP, Toth GG, Lai D, Zhu H, Acar G, Agostoni P, Appelman Y, Arslan F, Barbato E, Chen SL, Di Serafino L, Dominguez-Franco AJ, Dupouy P, Esen AM, Esen OB, Hamilos M, Iwasaki K, Jensen LO, Jimenez-Navarro MF, Katritsis DG, Kocaman SA, Koo BK, Lopez-Palop R, Lorin JD, Miller LH, Muller O, Nam CW, Oud N, Puymirat E, Rieber J, Rioufol G, Rodes-Cabau J, Sedlis SP, Takeishi Y, Tonino PA, Van Belle E, Verna E, Werner GS, Fearon WF, Pijls NH, De Bruyne B and Gould KL. Prognostic value of fractional flow reserve: linking physiologic severity to clinical outcomes. *J Am Coll Cardiol*. 2014;64:1641-54.
7. Doh JH, Nam CW, Koo BK, Lee SY, Choi H, Namgung J, Kwon SU, Kwak JJ, Kim HY, Choi WH and Lee WR. Clinical Relevance of Poststent Fractional Flow Reserve After Drug-Eluting Stent Implantation. *J Invasive Cardiol*. 2015;27:346-51.
8. Reith S, Battermann S, Hellmich M, Marx N and Burgmaier M. Correlation between OCT-derived intrastent dimensions and fractional flow reserve measurements after coronary stent implantation and impact on clinical outcome. *J Invasive Cardiol*. 2015;27:222-8.
9. Agarwal SK, Kasula S, Hacıoglu Y, Ahmed Z, Uretsky BF and Hakeem A. Utilizing Post-Intervention Fractional Flow Reserve to Optimize Acute Results and the Relationship to Long-Term Outcomes. *JACC Cardiovasc Interv*. 2016;9:1022-31.
10. Kasula S, Agarwal SK, Hacıoglu Y, Pothineni NK, Bhatti S, Ahmed Z, Uretsky B and Hakeem A. Clinical and prognostic value of poststenting fractional flow reserve in acute coronary syndromes. *Heart (British Cardiac Society)*. 2016;102:1988-1994.
11. Matsuda J, Murai T, Kanaji Y, Usui E, Araki M, Niida T, Ichijyo S, Hamaya R, Lee T, Yonetsu T, Isobe M and Kakuta T. Prevalence and Clinical Significance of Discordant Changes in Fractional and Coronary Flow Reserve After Elective Percutaneous Coronary Intervention. *J Am Heart Assoc*. 2016;5:e00400.
12. Li SJ, Ge Z, Kan J, Zhang JJ, Ye F, Kwan TW, Santoso T, Yang S, Sheiban I, Qian XS, Tian NL, Rab TS, Tao L and Chen SL. Cutoff Value and Long-Term Prediction of Clinical Events by FFR Measured Immediately After Implantation of a Drug-Eluting Stent in Patients With Coronary Artery Disease: 1- to 3-Year Results From the DKCRUSH VII Registry Study. *JACC Cardiovasc Interv*. 2017;10:986-995.
13. Piroth Z, Toth GG, Tonino PAL, Barbato E, Aghlmandi S, Curzen N, Rioufol G, Pijls NHJ, Fearon WF, Juni P and De Bruyne B. Prognostic Value of Fractional Flow Reserve Measured Immediately After Drug-Eluting Stent Implantation. *Circ Cardiovasc Interv*. 2017;10: e005233.
14. Lee JM, Hwang D, Choi KH, Rhee TM, Park J, Kim HY, Jung HW, Hwang JW, Lee HJ, Jang HJ, Kim SH, Song YB, Cho YK, Nam CW, Hahn JY, Shin ES, Kawase Y, Matsuo A, Tanaka N, Doh JH, Koo BK and Matsuo H. Prognostic Implications of Relative Increase and Final Fractional Flow Reserve in Patients With Stent Implantation. *JACC Cardiovasc Interv*. 2018;11:2099-2109.
15. Usui E, Murai T, Kanaji Y, Hoshino M, Yamaguchi M, Hada M, Hamaya R, Kanno Y, Lee T, Yonetsu T and Kakuta T. Clinical significance of concordance or discordance between fractional flow reserve and coronary flow reserve for coronary physiological indices, microvascular resistance, and prognosis after elective percutaneous coronary intervention. *EuroIntervention*. 2018;14:798-805.
16. Azzalini L, Poletti E, Demir OM, Ancona MB, Mangieri A, Giannini F, Carlino M, Chieffo A, Montorfano M, Colombo A and Latib A. Impact of Post-Percutaneous Coronary Intervention Fractional Flow Reserve Measurement on Procedural Management and Clinical Outcomes: The REPEAT-FFR Study. *J Invasive Cardiol*. 2019;31:229-234.
17. Hakeem A, Ghosh B, Shah K, Agarwal S, Kasula S, Hacıoglu Y, Bhatti S, Ahmed Z and Uretsky B.

Incremental Prognostic Value of Post-Intervention Pd/Pa in Patients Undergoing Ischemia-Driven Percutaneous Coronary Intervention. *JACC Cardiovasc Interv.* 2019;12:2002-2014.

18. Hoshino M, Kanaji Y, Hamaya R, Kanno Y, Hada M, Yamaguchi M, Sumino Y, Usui E, Sugano A, Murai T, Lee T, Yonetsu T and Kakuta T. Prognostic value of post-intervention fractional flow reserve after intravascular ultrasound-guided second-generation drug-eluting coronary stenting. *EuroIntervention.* 2019;15:e779-e787.

19. Hwang D, Lee JM, Lee HJ, Kim SH, Nam CW, Hahn JY, Shin ES, Matsuo A, Tanaka N, Matsuo H, Lee SY, Doh JH and Koo BK. Influence of Target Vessel on Prognostic Relevance of Fractional Flow Reserve After Coronary Stenting. *EuroIntervention.* 2019;15(5):457-464.

20. Yang HM, Lim HS, Yoon MH, Seo KW, Choi BJ, Choi SY, Hwang GS and Tahk SJ. Usefulness of the trans-stent fractional flow reserve gradient for predicting clinical outcomes. *Catheter Cardiovasc Interv.* 2020;95:E123-e129.

21. Hwang D, Lee JM, Yang S, Chang M, Zhang J, Choi KH, Kim CH, Nam CW, Shin ES, Kwak JJ, Doh JH, Hoshino M, Hamaya R, Kanaji Y, Murai T, Zhang JJ, Ye F, Li X, Ge Z, Chen SL, Kakuta T and Koo BK. Role of Post-Stent Physiological Assessment in a Risk Prediction Model After Coronary Stent Implantation. *JACC Cardiovasc Interv.* 2020;13:1639-1650.

22. Hamaya R, Mittleman MA, Hoshino M, Kanaji Y, Murai T, Lee JM, Choi KH, Zhang J, Ye F, Li X, Chen S and Kakuta T. Prognostic Value of Pre-Revascularization Fractional Flow Reserve Mediated by the Post-Revascularization Level: A Causal Mediation Analysis. *JAMA Network Open.* 2020;3(9):e2018162.

23. Shin D, Lee SH, Lee JM, Choi KH, Hwang D, Lee HJ, Jang HJ, Kim HK, Kwak JJ, Ha SJ, Song YB, Shin ES and Doh JH. Prognostic Implications of Post-Intervention Resting Pd/Pa and Fractional Flow Reserve in Patients With Stent Implantation. *JACC Cardiovasc Interv.* 2020;13:1920-1933.

24. Hokama Y, Tanaka N, Takashima H, Kadota K, Fujita H, Tan M, Yamada R, Naruse H, Kawamura A, Suzuki N, Takeuchi T, Tazaki J, Yamaki M, Takamisawa I, Abe S, Terai H, Makiguchi N, Matsumoto C and Chikamori T. Insufficient recovery of fractional flow reserve even after optimal implantation of drug-eluting stents: 3-year outcomes from the FUJI study. *J Cardiol.* 2020;S0914-5087(20)30397-X.

25. Shin D, Dai N, Lee SH, Choi KH, Lefieux A, Molony D, Hwang D, Kim HK, Jeon KH, Lee HJ, Jang HJ, Ha SJ, Park TK, Yang JH, Song YB, Hahn JY, Choi SH, Doh JH, Shin ES, Nam CW, Koo BK, Gwon HC, Ge J and Lee JM. Physiological Distribution and Local Severity of Coronary Artery Disease and Outcomes After Percutaneous Coronary Intervention. *JACC Cardiovasc Interv.* 2021;14:1771-1785.

26. Yang S, Zhang J, Hwang D, Lee JM, Nam CW, Shin ES, Doh JH, Hoshino M, Hamaya R, Kanaji Y, Murai T, Zhang JJ, Ye F, Li X, Ge Z, Chen SL, Kakuta T and Koo BK. Effect of Coronary Disease Characteristics on Prognostic Relevance of Residual Ischemia After Stent Implantation. *Front Cardiovasc Med.* 2021;8:696756.

27. Zhang J, Hwang D, Yang S, Kim CH, Lee JM, Nam CW, Shin ES, Doh JH, Hoshino M, Hamaya R, Kanaji Y, Murai T, Zhang JJ, Ye F, Li X, Ge Z, Chen SL, Kakuta T and Koo BK. Differential Prognostic Implications of Pre- and Post-Stent Fractional Flow Reserve in Patients Undergoing Percutaneous Coronary Intervention. *Korean Circ J.* 2022;52:47-59.

28. Diletti R, Masdjedi K, Daemen J, van Zandvoort LJC, Neleman T, Wilschut J, Den Dekker WK, van Bommel RJ, Lemmert M, Kardys I, Cummins P, de Jaegere P, Zijlstra F and Van Mieghem NM. Impact of Poststenting Fractional Flow Reserve on Long-Term Clinical Outcomes: The FFR-SEARCH Study. *Circ Cardiovasc Interv.* 2021;14:e009681.

29. Collison D, Didagelos M, Aetesam-Ur-Rahman M, Copt S, McDade R, McCartney P, Ford TJ, McClure J, Lindsay M, Shaikat A, Rocchiccioli P, Brogan R, Watkins S, McEntegart M, Good R, Robertson K, O'Boyle P, Davie A, Khan A, Hood S, Eteiba H, Berry C and Oldroyd KG. Post-stenting fractional flow reserve vs coronary angiography for optimization of percutaneous coronary intervention (TARGET-FFR). *Eur Heart J.* 2021;42:4656-4668.
